# Supplementary material
Source: PubMed Central journal article supplement (PMC6594191)
Supplement: NIHMS1006800-supplement-3.pdf [file NIHMS1006800-supplement-3.pdf]

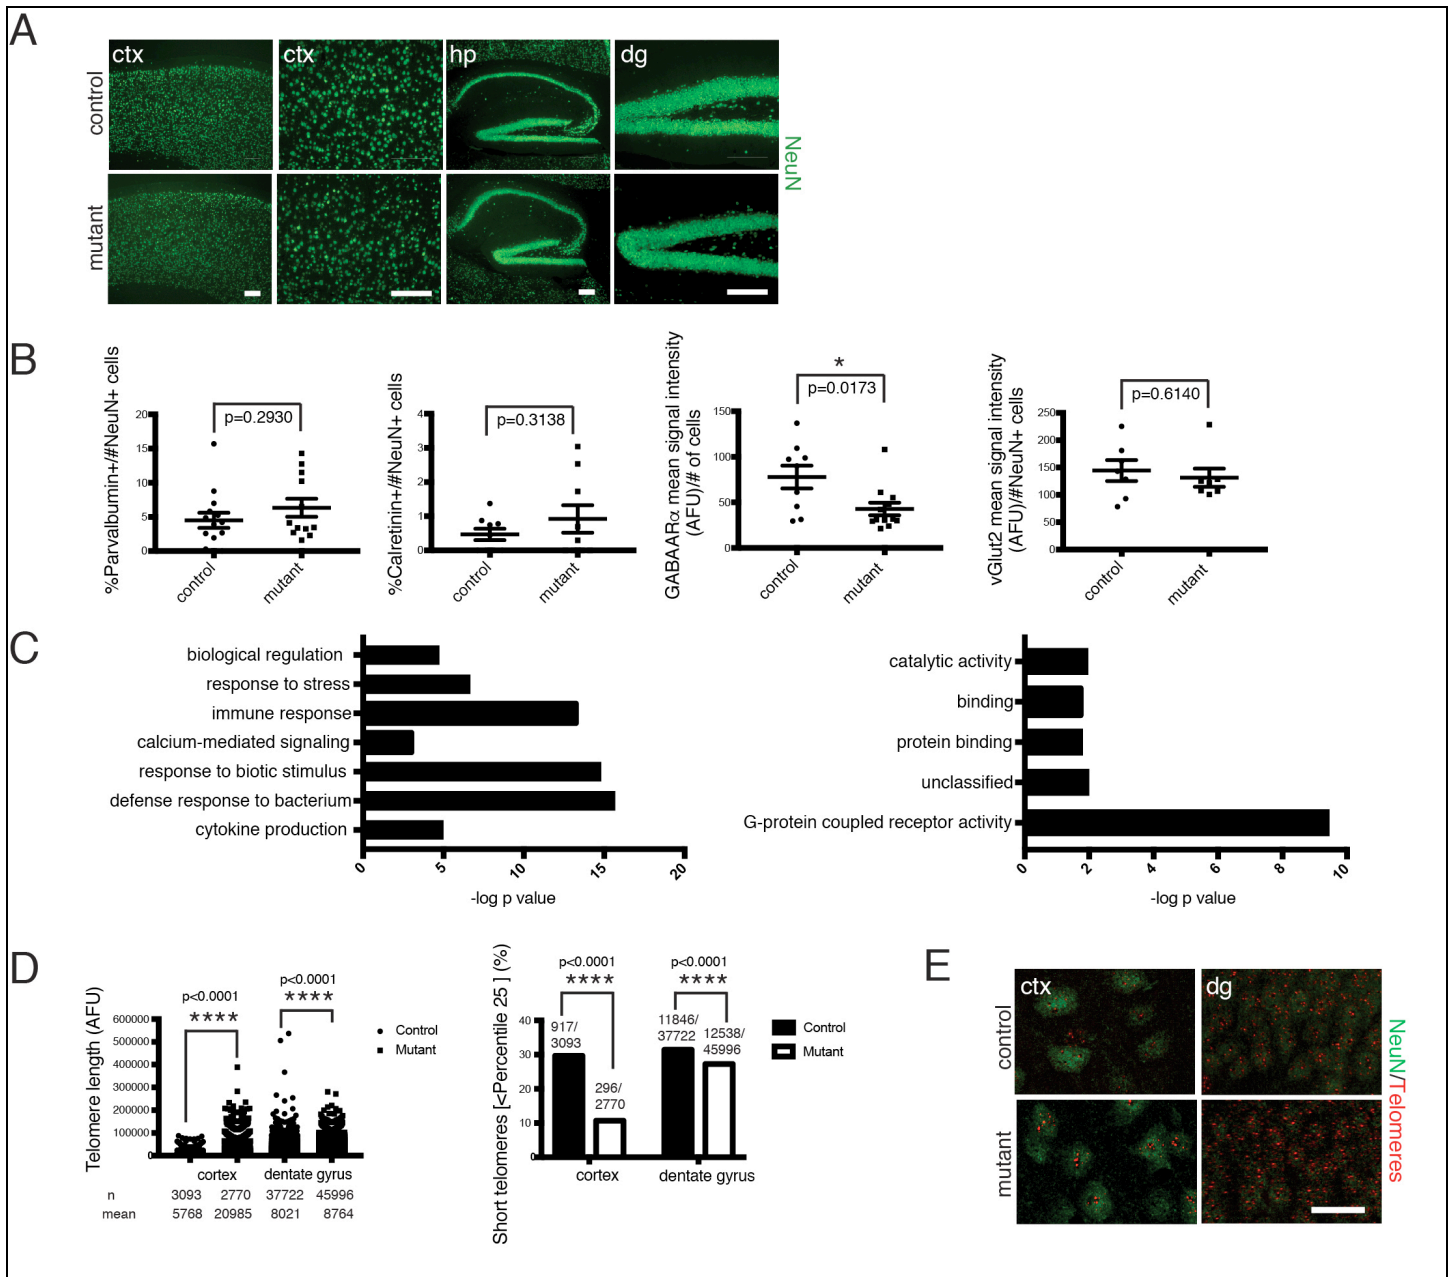

## Supplementary Figure 1

### Histologic and molecular analysis of *iCK-cre* mutants.

**A.** Immunofluorescence staining for NeuN in different brain regions. **B.** Quantification of indicated neuronal lineage markers in *iCK-cre* mutant (M) vs. control (C) brains. (Left-most panel) Parvalbumin,  $n=12M, 14C$ ,  $p=0.2930$ ; (Middle-left panel) Calretinin,  $n=9M, 9C$ ,  $p=0.3138$ ; (Middle-right panel) GABAAR $\alpha$ ,  $n=12M, 9C$ ,  $p=0.0173$ ; (Right-most panel) vGlut2,  $n=7M, 7C$ ,  $p=0.6140$ . \* $p<0.05$ . Two-tailed unpaired Student's *t*-test. Data is presented as mean  $\pm$  SEM. **C.** Gene ontology analysis of gene events ( $n=239$  unique genes; listed in Table S1) in *iCK-cre* mutants ( $n=3$ ) compared to controls ( $n=3$ ) by PANTHER, showing functional annotations by biologic process (left panel) and molecular function (right panel) using Fisher's Exact Test with false discovery rate adjustment. **D.** Quantification of mean telomere length (left panel) and % of short telomeres (right panel) of cortical and dentate gyrus (dg) neurons in *iCK-cre* mutants (cortex:  $n=2770$ ; dg:  $n=45996$ ) vs. controls (cortex:  $n=3093$ ; dg:  $n=37722$ ). \*\*\*\* $p<0.0001$  using two-tailed unpaired Student's *t*-test and Chi-square test, respectively. Telomere length is presented as mean  $\pm$  SEM, while % short telomeres is presented as a ratio of number of short telomeres (below 25<sup>th</sup> percentile) over total number of telomeres. **E.** Telomere FISH images of *iCK-cre* mutants vs. controls in the cortex and dentate gyrus. All scale bars=100  $\mu$ m. In A and E, experiments were independently repeated with similar results at least

n=3 times using at least n=3 different mouse tissue samples for each group.

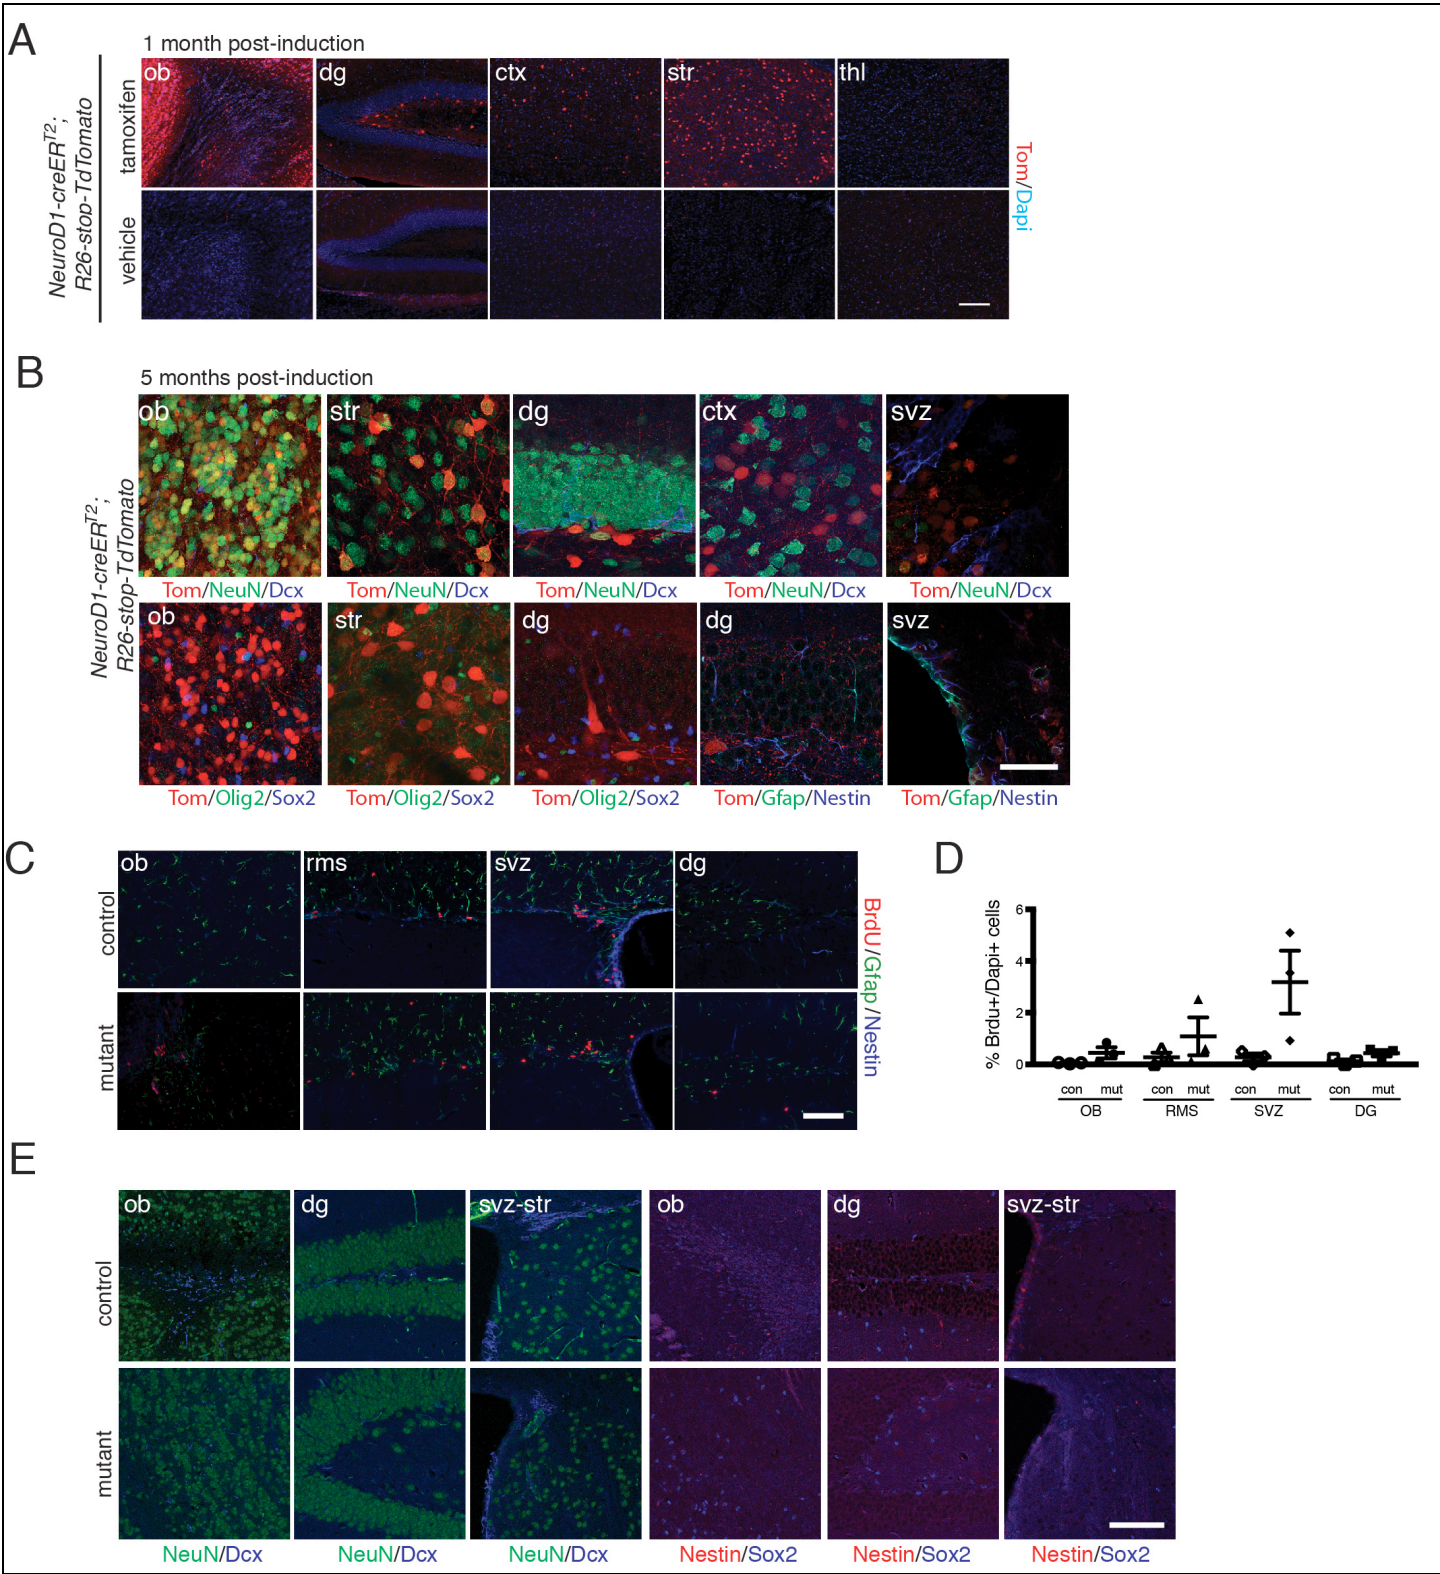

**Supplementary Figure 2**

Expression analysis of *iND-cre* Tomato reporter and mutant/control brains.

**A.** Tomato staining of *iND-cre*; *R26-stop-TdTomato* reporter and control at 4 weeks post-induction. **B.** Immunostaining of *iND-cre* reporter with lineage markers at 5 months post-induction **C.** Immunofluorescence staining of *iND-cre* mutant vs. control at 10 weeks post-induction. **D.** Quantification of % BrdU-positive cells in aged *iND-cre* mutants (n=3) vs. controls (n=3) in each of the indicated brain regions. Data is presented as mean  $\pm$  SEM. **E.** Immunofluorescence staining of aged *iND-cre* mutant vs. control at >6 months post-induction. All scale bars=100  $\mu$ m. In A, B, C and E, experiments were independently repeated with similar results at least n=3 times using at least n=3 different mouse tissue samples for each group.



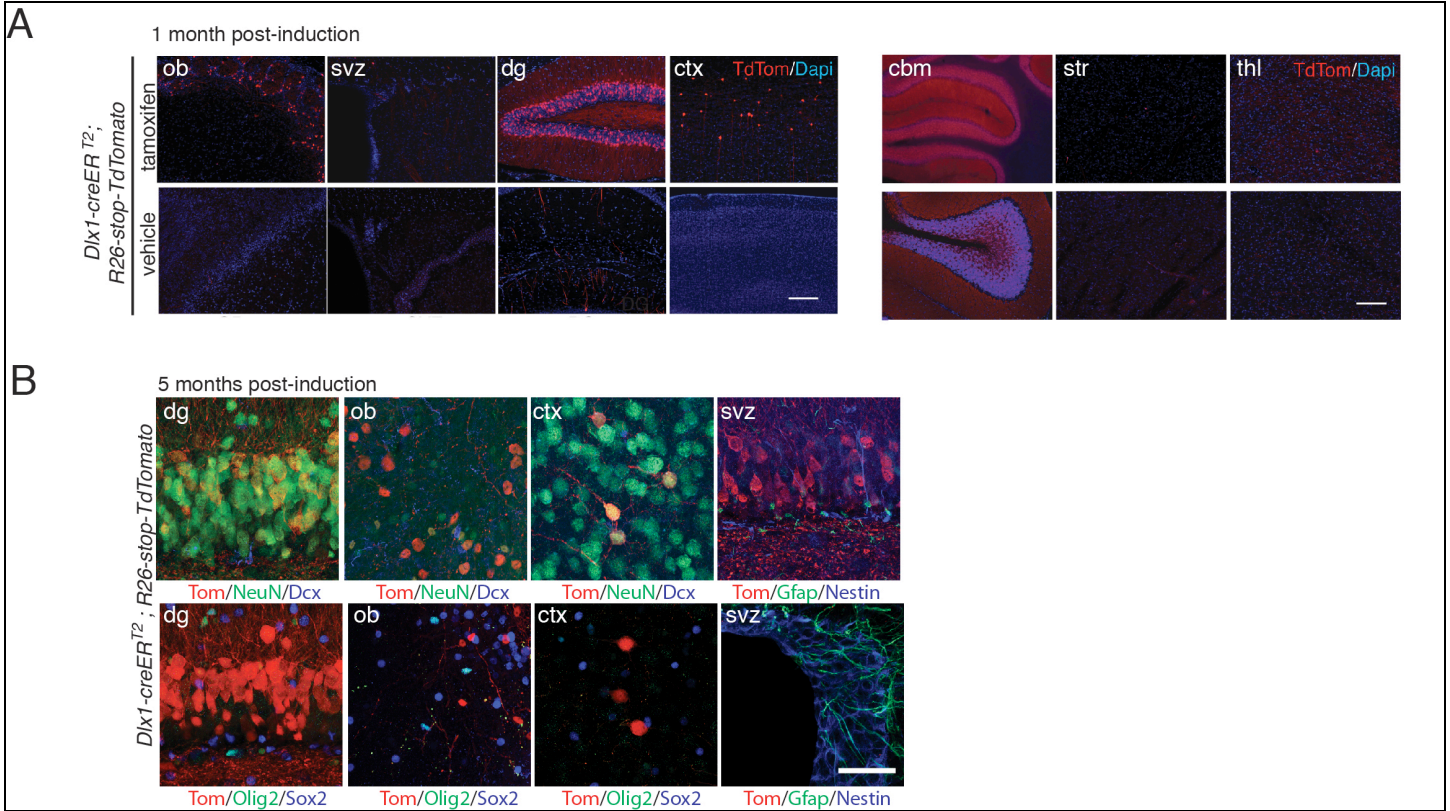

**Supplementary Figure 3**

**Expression analysis of *iDlx-cre* Tomato reporter.**

**A.** Tomato staining of tamoxifen- and vehicle-treated *iDlx-cre;R26-stop-TdTomato* reporter at 1 month post-induction. **B.** Immunostaining of *iDlx-cre;R26-stop-TdTomato* reporter with lineage markers at 5 months post-induction. All scale bars=100  $\mu$ m. In A and B, experiments were independently repeated with similar results at least n=3 times using at least n=3 different mouse tissue samples for each group.

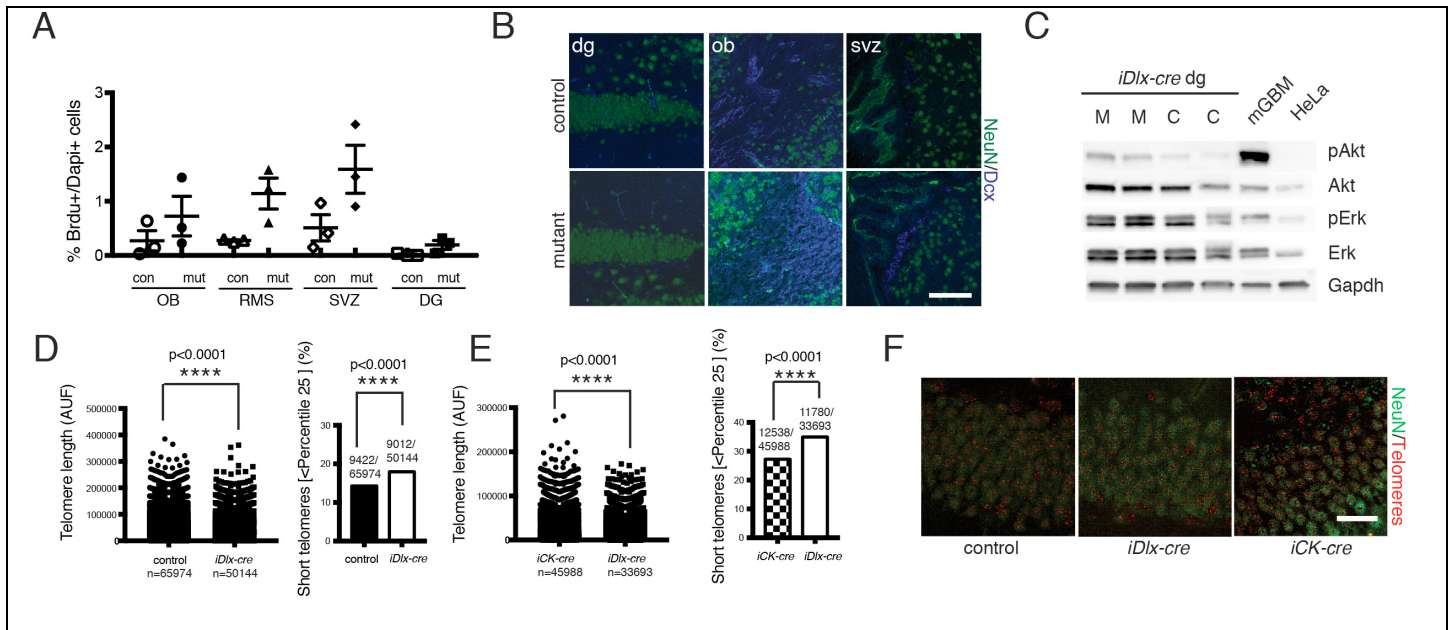

#### Supplementary Figure 4

#### Molecular and histologic analysis of *iDlx-cre* mutants.

**A.** Quantification of % BrdU-positive cells in aged *iDlx-cre* mutants (n=3) vs. controls (n=3) in each of the indicated brain regions. Data is presented as mean +/- SEM. **B.** Immunostaining of aged *iDlx-cre* mutants and controls with lineage markers. **C.** Western blot analysis of MAPK and PI3K pathway components in *iDlx-cre* mutant (M) and control (C) brains. Mouse GBM (mGBM) and HeLa cell lysates were used as positive controls. **D.** Quantification of mean telomere length (left panel) and % of short telomeres (right panel) of dentate gyrus neurons in *iDlx-cre* mutants (n=50144) vs. controls (n=65974). **E.** Quantification of mean telomere length (left panel) and % of short telomeres (right panel) of dentate gyrus neurons in *iDlx-cre* (n=33693) vs. *iCK-cre* (n=45988) mutants. In D and E, telomere length is presented as mean +/- SEM, while % short telomeres is presented as a ratio of the number of short telomeres (below 25<sup>th</sup> percentile) over total number of telomeres. \*\*\*\*p<0.0001 using two tailed unpaired Student's *t*-test and Chi-square test, respectively. **F.** Telomere FISH images of *iDlx-cre* and *iCK-cre* mutants and controls in the dentate gyrus. All scale bars=100  $\mu$ m. In B, C, and F, experiments were independently repeated with similar results at least n=3 times using at least n=3 different mouse tissue samples for each group.

**A**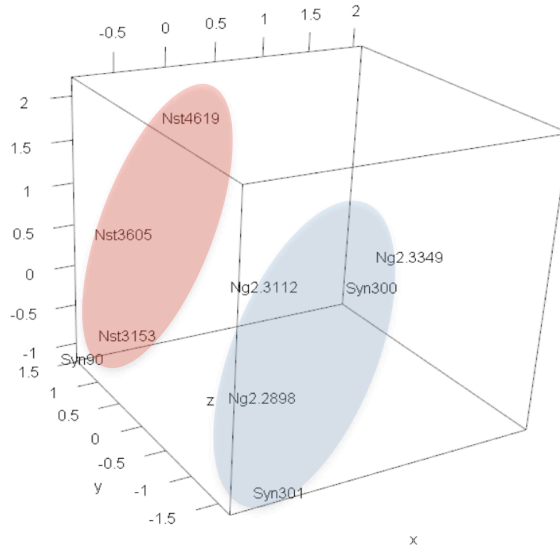**B**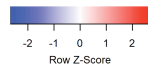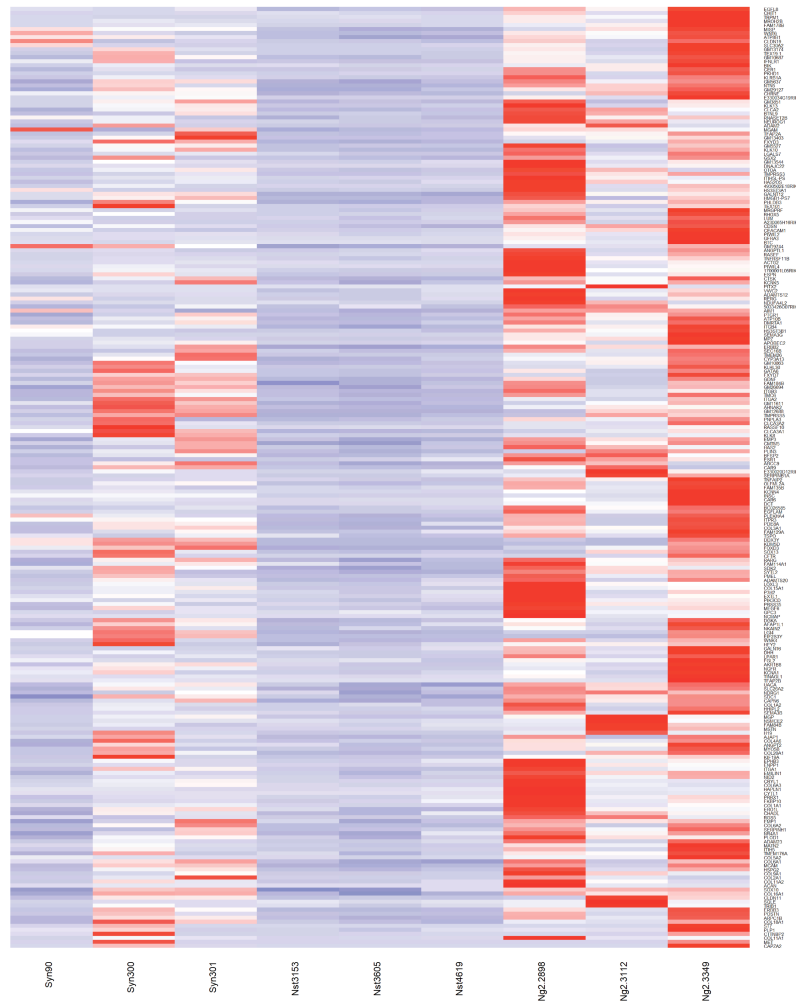

## Supplementary Figure 5

### Molecular Profiling of *Syn-cre* Tumors.

RNA Sequencing analysis of *Syn-cre*, *Nestin-creER<sup>T2</sup>*, and *NG2-creER<sup>TM</sup>* tumors. **A.** Dimension reduction analysis of *Syn-cre* (n=3), *Nestin-creER<sup>T2</sup>* (n=3), and *NG2-creER<sup>TM</sup>* (n=3) mutant tumors. **B.** Heat map showing expression of *NG2-creER<sup>TM</sup>* tumor signature genes (also listed in Table S2) in *Syn-cre* (n=3), *Nestin-creER<sup>T2</sup>* (n=3), and *NG2-creER<sup>TM</sup>* (n=3) tumors.
